# Supplementary material for: Axitinib and sorafenib are potent in tyrosine kinase inhibitor resistant chronic myeloid leukemia cells
Source: Cell Commun Signal. 2016 Feb 24;14:6. doi: 10.1186/s12964-016-0129-y (PMC4765141; doi:10.1186/s12964-016-0129-y)
Supplement: Additional file 7: Table S4. — Anti-GAB2 IP of Imatinib, Axitinib and Sorafenib vs DMSO treated cells. SILAC ratios are normalized to GAB2. Only sites with localization probabilities greater 0.75 and Andromeda scores greater 40 are shown. PEP: posterior error probability. (XLSX 12 kb) [file 12964_2016_129_MOESM7_ESM.xlsx]

## Sheet: Sheet1
Supplemental Table 4: Anti-GAB2 IP of Imatinib, Axitinib and Sorafenib vs DMSO treated cells. SILAC ratios are normalized to GAB2. Only sites with localization probabilities greater 0.75 and Andromeda scores greater 40 are shown. PEP: posterior error probability.
Proteins	Positions within proteins	Protein names	Gene names	Fasta headers	Localization prob	Score diff	PEP	Score	Delta score	Score for localization	Number of Phospho (STY)	Amino acid	Modified sequence	Phospho (STY) Probabilities	Phospho (STY) Score diffs	Position in peptide	Charge	m/z	Mass error [ppm]	log2 IM/DMSO Exp1	Ratio H/M variability [%] Exp1	Ratio H/M count Exp1	log2 IM/DMSO Exp2	Ratio H/M variability [%] Exp2	Ratio H/M count Exp2	log2 SF/DMSO Exp1	Ratio H/L variability [%] Exp1	Ratio H/L count Exp1	log2 SF/DMSO Exp2	Ratio M/L variability [%] Exp2	Ratio M/L count Exp2	log2 AX/DMSO Exp1	Ratio H/L variability [%] Exp1	Ratio H/L count Exp1	log2 AX/DMSO Exp2	Ratio M/L variability [%] Exp2	Ratio M/L count Exp2	id
Q9UQC2;Q9UQC2-2	476;438	GRB2-associated-binding protein 2	GAB2	>sp|Q9UQC2|GAB2_HUMAN GRB2-associated-binding protein 2 OS=Homo sapiens GN=GAB2 PE=1 SV=1;>sp|Q9UQC2-2|GAB2_HUMAN Isoform 2 of GRB2-associated-binding protein 2 OS=Homo sapiens GN=GAB2	0.770604	9.8601	0.0397084	44.721	41.105	44.721	1	Y	_AGDNSQSVY(ph)IPM(ox)SPGAHHFDSLGYPSTTLPVHR_	AGDNS(0.08)QS(0.08)VY(0.771)IPMS(0.068)PGAHHFDS(0.002)LGYPSTTLPVHR	AGDNS(-9.86)QS(-9.86)VY(9.86)IPMS(-10.56)PGAHHFDS(-26.66)LGY(-32.25)PS(-37.28)T(-39.43)T(-41.02)LPVHR	9	4	909.416	0.54639	-1.33757	NaN	1							0.979435	NaN	1							83
Q9UQC2;Q9UQC2-2	625;587	GRB2-associated-binding protein 2	GAB2	>sp|Q9UQC2|GAB2_HUMAN GRB2-associated-binding protein 2 OS=Homo sapiens GN=GAB2 PE=1 SV=1;>sp|Q9UQC2-2|GAB2_HUMAN Isoform 2 of GRB2-associated-binding protein 2 OS=Homo sapiens GN=GAB2	0.788479	11.4513	2.53319e-06	104.38	88.415	104.38	2	S	_KS(ph)TGSVDYLALDFQPSSPS(ph)PHR_	KS(0.659)T(0.166)GS(0.089)VDY(0.087)LALDFQPS(0.106)S(0.106)PS(0.788)PHR	KS(5.94)T(-5.94)GS(-9.75)VDY(-11.45)LALDFQPS(-11.45)S(-11.45)PS(11.45)PHR	19	3	850.375	0.32686				-1.90644	NaN	1										-2.83988	NaN	1	40
Q9UQC2;Q9UQC2-2	405;367	GRB2-associated-binding protein 2	GAB2	>sp|Q9UQC2|GAB2_HUMAN GRB2-associated-binding protein 2 OS=Homo sapiens GN=GAB2 PE=1 SV=1;>sp|Q9UQC2-2|GAB2_HUMAN Isoform 2 of GRB2-associated-binding protein 2 OS=Homo sapiens GN=GAB2	0.814933	6.46215	0.00212278	101.56	101.56	76.326	1	S	_ASS(ph)CETYEYPQR_	AS(0.184)S(0.815)CET(0.001)YEYPQR	AS(-6.46)S(6.46)CET(-30.17)Y(-35.56)EY(-46.52)PQR	3	2	785.798	-1.3204	0.00231875	8.1876	3	-0.463353	39.572	2				0.258974	4.2346	3				-0.115105	11.052	2	34
Q9UQC2;Q9UQC2-2	322;284	GRB2-associated-binding protein 2	GAB2	>sp|Q9UQC2|GAB2_HUMAN GRB2-associated-binding protein 2 OS=Homo sapiens GN=GAB2 PE=1 SV=1;>sp|Q9UQC2-2|GAB2_HUMAN Isoform 2 of GRB2-associated-binding protein 2 OS=Homo sapiens GN=GAB2	0.829046	6.97213	2.52901e-11	115.99	107.98	109.12	1	S	_EFGDLLVDNMDVPATPLS(ph)AYQIPR_	EFGDLLVDNMDVPAT(0.004)PLS(0.829)AY(0.166)QIPR	EFGDLLVDNMDVPAT(-22.68)PLS(6.97)AY(-6.97)QIPR	18	2	1371.15	0.15622	-2.09779	NaN	1	-1.41875	NaN	1				0.169311	NaN	1				-1.27875	NaN	1	35
Q9UQC2;Q9UQC2-2	622;584	GRB2-associated-binding protein 2	GAB2	>sp|Q9UQC2|GAB2_HUMAN GRB2-associated-binding protein 2 OS=Homo sapiens GN=GAB2 PE=1 SV=1;>sp|Q9UQC2-2|GAB2_HUMAN Isoform 2 of GRB2-associated-binding protein 2 OS=Homo sapiens GN=GAB2	0.920081	11.5348	5.21267e-05	100.01	89.932	100.01	2	S	_KSTGSVDY(ph)LALDFQPS(ph)SPSPHR_	KS(0.004)T(0.02)GS(0.02)VDY(0.956)LALDFQPS(0.92)S(0.07)PS(0.01)PHR	KS(-24.69)T(-18.22)GS(-18.22)VDY(18.22)LALDFQPS(11.53)S(-11.53)PS(-24.4)PHR	16	3	850.375	0.54067	-2.52706	NaN	1							-0.588607	NaN	1							39
Q9UQC2;Q9UQC2-2	218;180	GRB2-associated-binding protein 2	GAB2	>sp|Q9UQC2|GAB2_HUMAN GRB2-associated-binding protein 2 OS=Homo sapiens GN=GAB2 PE=1 SV=1;>sp|Q9UQC2-2|GAB2_HUMAN Isoform 2 of GRB2-associated-binding protein 2 OS=Homo sapiens GN=GAB2	0.970934	15.4044	0.000298044	104.59	71.176	104.59	1	S	_AS(ph)FLMRSDTAVQK_	AS(0.971)FLMRS(0.001)DT(0.028)AVQK	AS(15.4)FLMRS(-29.49)DT(-15.4)AVQK	2	2	767.36	-0.14497	0.103246	49.263	2	-0.788896	NaN	1				0.462338	42.611	2				-0.750473	NaN	1	33
Q9UQC2;Q9UQC2-2	324;286	GRB2-associated-binding protein 2	GAB2	>sp|Q9UQC2|GAB2_HUMAN GRB2-associated-binding protein 2 OS=Homo sapiens GN=GAB2 PE=1 SV=1;>sp|Q9UQC2-2|GAB2_HUMAN Isoform 2 of GRB2-associated-binding protein 2 OS=Homo sapiens GN=GAB2	0.997222	25.5728	2.18108e-42	169.84	152.62	109.44	1	Y	_EFGDLLVDNMDVPATPLSAY(ph)QIPR_	EFGDLLVDNMDVPATPLS(0.003)AY(0.997)QIPR	EFGDLLVDNMDVPAT(-48.5)PLS(-25.57)AY(25.57)QIPR	20	2	1371.15	-0.67866	-2.04191	10.401	7	-1.33163	16.857	4				0.136889	12.957	7				-1.00547	9.7094	4	84
Q9UQC2;Q9UQC2-2	293;255	GRB2-associated-binding protein 2	GAB2	>sp|Q9UQC2|GAB2_HUMAN GRB2-associated-binding protein 2 OS=Homo sapiens GN=GAB2 PE=1 SV=1;>sp|Q9UQC2-2|GAB2_HUMAN Isoform 2 of GRB2-associated-binding protein 2 OS=Homo sapiens GN=GAB2	0.999171	30.8116	2.23754e-25	163.02	133.4	151.44	1	Y	_GSLTGSETDNEDVY(ph)TFK_	GSLTGSETDNEDVY(0.999)T(0.001)FK	GS(-114.84)LT(-107.85)GS(-78.67)ET(-69.91)DNEDVY(30.81)T(-30.81)FK	14	2	971.901	0.39641	-2.71573	33.256	8	-2.33284	52.905	5				0.460277	9.1135	8				-1.3304	37.047	5	85
Q9UQC2;Q9UQC2-2	614;576	GRB2-associated-binding protein 2	GAB2	>sp|Q9UQC2|GAB2_HUMAN GRB2-associated-binding protein 2 OS=Homo sapiens GN=GAB2 PE=1 SV=1;>sp|Q9UQC2-2|GAB2_HUMAN Isoform 2 of GRB2-associated-binding protein 2 OS=Homo sapiens GN=GAB2	0.999933	44.9713	1.73107e-41	181.54	162.44	167.97	1;2	Y	_STGSVDY(ph)LALDFQPSSPSPHR_	STGSVDY(1)LALDFQPSSPSPHR	S(-47.57)T(-47.57)GS(-44.97)VDY(44.97)LALDFQPS(-134.06)S(-138.15)PS(-154.09)PHR	7	2	1171.03	-0.56027	-2.83901	40.8205	18	-2.3022	15.3248	15	0.451328	8.1492	2	0.687694	9.5399	16	-1.91136	7.7109	2	-1.89793	44.51	13	88
Q9UQC2;Q9UQC2-2	643;605	GRB2-associated-binding protein 2	GAB2	>sp|Q9UQC2|GAB2_HUMAN GRB2-associated-binding protein 2 OS=Homo sapiens GN=GAB2 PE=1 SV=1;>sp|Q9UQC2-2|GAB2_HUMAN Isoform 2 of GRB2-associated-binding protein 2 OS=Homo sapiens GN=GAB2	1	116.837	0.00224181	116.84	76.821	116.84	1	Y	_VDY(ph)VQVDKEK_	VDY(1)VQVDKEK	VDY(116.84)VQVDKEK	3	2	651.803	0.27862	-0.584639	NaN	1	-1.2256	28.706	2				1.53651	NaN	1				-2.32743	65.317	2	87
